# Supplementary material for: Hepatic PKA inhibition accelerates the lipid accumulation in liver
Source: Nutr Metab (Lond). 2019 Oct 11;16:69. doi: 10.1186/s12986-019-0400-5 (PMC6788098; doi:10.1186/s12986-019-0400-5)
Supplement: Supplementary file 5 — Additional file 5. The gene symbols, fold change and adjusted-p values of the DEGs of PKAi and control mice are listed in the table [file 12986_2019_400_MOESM5_ESM.xlsx]

## Sheet: CD_PKAi vs CD_control
Geneid	Description	logFC (CD_PKAi vs CD_control)	adj.Pvalue (CD_PKAi vs CD_control)
Serpina3l-ps	serine (or cysteine) peptidase inhibitor%2C clade A%2C member 3L%2C pseudogene [Source:MGI Symbol%3BAcc:MGI:2182857]	2.60836	0.00114311
Serpina3h	serine (or cysteine) peptidase inhibitor%2C clade A%2C member 3H [Source:MGI Symbol%3BAcc:MGI:2182839]	2.13939	0.038368
Cxcl9	chemokine (C-X-C motif) ligand 9 [Source:MGI Symbol%3BAcc:MGI:1352449]	1.87258	0.00663922
Tgtp1	T cell specific GTPase 1 [Source:MGI Symbol%3BAcc:MGI:98734]	1.84023	0.000425325
Hist1h2ad	histone cluster 1%2C H2ad [Source:MGI Symbol%3BAcc:MGI:2448289]	1.80464	0.00534344
Gm12185	predicted gene 12185 [Source:MGI Symbol%3BAcc:MGI:3652173]	1.78769	0.000868997
Gm15889	predicted gene 15889 [Source:MGI Symbol%3BAcc:MGI:3802159]	1.75053	0.0351877
Hist1h2bq	histone cluster 1%2C H2bq [Source:MGI Symbol%3BAcc:MGI:3702051]	1.73317	0.00253688
2610035D17Rik	RIKEN cDNA 2610035D17 gene [Source:MGI Symbol%3BAcc:MGI:1919636]	1.72366	0.00142652
Amelx	amelogenin%2C X-linked [Source:MGI Symbol%3BAcc:MGI:88005]	1.72104	0.0315121
BC023105	cDNA sequence BC023105 [Source:MGI Symbol%3BAcc:MGI:2384767]	1.70045	0.0128305
Gm19680	predicted gene%2C 19680 [Source:MGI Symbol%3BAcc:MGI:5011865]	1.63957	0.0363889
Hist1h3d	histone cluster 1%2C H3d [Source:MGI Symbol%3BAcc:MGI:2448322]	1.59544	0.00399506
Gm20784	predicted gene%2C 20784 [Source:MGI Symbol%3BAcc:MGI:5434140]	1.50198	0.0120925
Hist1h4m	histone cluster 1%2C H4m [Source:MGI Symbol%3BAcc:MGI:2448441]	1.44339	0.0199817
Dsg1c	desmoglein 1 gamma [Source:MGI Symbol%3BAcc:MGI:2664358]	1.43227	0.0451572
Gbp6	guanylate binding protein 6 [Source:MGI Symbol%3BAcc:MGI:2140937]	1.34488	0.012561
Gm15409	predicted gene 15409 [Source:MGI Symbol%3BAcc:MGI:3705229]	1.33322	0.00592055
Gm15459	predicted gene 15459 [Source:MGI Symbol%3BAcc:MGI:3705702]	1.31528	0.0263867
G630022F23Rik	RIKEN cDNA G630022F23 gene [Source:MGI Symbol%3BAcc:MGI:3704248]	1.31443	0.0114725
Gm26825	predicted gene%2C 26825 [Source:MGI Symbol%3BAcc:MGI:5477319]	1.31294	0.0262858
Sult1c2	sulfotransferase family%2C cytosolic%2C 1C%2C member 2 [Source:MGI Symbol%3BAcc:MGI:1916333]	1.29928	0.00749839
Gm37195	predicted gene%2C 37195 [Source:MGI Symbol%3BAcc:MGI:5610423]	1.29829	0.0124966
Gm20236	predicted gene%2C 20236 [Source:MGI Symbol%3BAcc:MGI:5012421]	1.29707	0.0143718
A230056P14Rik	RIKEN cDNA A230056P14 gene [Source:MGI Symbol%3BAcc:MGI:2444856]	1.25305	0.0453178
Maff	v-maf musculoaponeurotic fibrosarcoma oncogene family%2C protein F (avian) [Source:MGI Symbol%3BAcc:MGI:96910]	1.24024	0.0228647
Gm10705	predicted gene 10705 [Source:MGI Symbol%3BAcc:MGI:3708678]	1.21485	0.0176801
B4galnt3	beta-1%2C4-N-acetyl-galactosaminyl transferase 3 [Source:MGI Symbol%3BAcc:MGI:3041155]	1.21428	0.0197252
Ndufa4l2	NADH dehydrogenase (ubiquinone) 1 alpha subcomplex%2C 4-like 2 [Source:MGI Symbol%3BAcc:MGI:3039567]	1.20687	0.0148216
D730003I15Rik	RIKEN cDNA D730003I15 gene [Source:MGI Symbol%3BAcc:MGI:1925971]	1.18998	0.028624
Tctn2	tectonic family member 2 [Source:MGI Symbol%3BAcc:MGI:1915228]	1.18805	0.0101063
Gdf15	growth differentiation factor 15 [Source:MGI Symbol%3BAcc:MGI:1346047]	1.18564	0.0340259
Hist1h2ao	histone cluster 1%2C H2ao [Source:MGI Symbol%3BAcc:MGI:2448302]	1.17396	0.0250929
Fam81a	family with sequence similarity 81%2C member A [Source:MGI Symbol%3BAcc:MGI:1924136]	1.17147	0.0054573
Gm37899	predicted gene%2C 37899 [Source:MGI Symbol%3BAcc:MGI:5611127]	1.14356	0.0339369
Gm9833	predicted gene 9833 [Source:MGI Symbol%3BAcc:MGI:3641855]	1.13934	0.0213023
Uhrf1	ubiquitin-like%2C containing PHD and RING finger domains%2C 1 [Source:MGI Symbol%3BAcc:MGI:1338889]	1.13801	0.0198836
Cd6	CD6 antigen [Source:MGI Symbol%3BAcc:MGI:103566]	1.13587	0.0183763
Cxcl10	chemokine (C-X-C motif) ligand 10 [Source:MGI Symbol%3BAcc:MGI:1352450]	1.13577	0.0110698
Gm43759	predicted gene 43759 [Source:MGI Symbol%3BAcc:MGI:5663896]	1.12809	0.0250535
Igkv4-72	immunoglobulin kappa chain variable 4-72 [Source:MGI Symbol%3BAcc:MGI:2686345]	1.12211	0.0181484
1700028E10Rik	RIKEN cDNA 1700028E10 gene [Source:MGI Symbol%3BAcc:MGI:1916713]	1.11806	0.0354397
Gm44787	predicted gene 44787 [Source:MGI Symbol%3BAcc:MGI:5753363]	1.11111	0.0285097
1500035N22Rik	RIKEN cDNA 1500035N22 gene [Source:MGI Symbol%3BAcc:MGI:1917508]	1.10958	0.0173407
Gm24062	predicted gene%2C 24062 [Source:MGI Symbol%3BAcc:MGI:5453839]	1.1001	0.0212364
Gm21816	predicted gene%2C 21816 [Source:MGI Symbol%3BAcc:MGI:5433980]	1.09789	0.0302588
Lrtm2	leucine-rich repeats and transmembrane domains 2 [Source:MGI Symbol%3BAcc:MGI:2141485]	1.08518	0.016046
Dusp14	dual specificity phosphatase 14 [Source:MGI Symbol%3BAcc:MGI:1927168]	1.07544	0.0284391
Flrt1	fibronectin leucine rich transmembrane protein 1 [Source:MGI Symbol%3BAcc:MGI:3026647]	1.07366	0.0192573
Acmsd	amino carboxymuconate semialdehyde decarboxylase [Source:MGI Symbol%3BAcc:MGI:2386323]	1.06596	0.00449394
D730045B01Rik	RIKEN cDNA D730045B01 gene [Source:MGI Symbol%3BAcc:MGI:1925117]	1.0558	0.0411486
Gm15411	predicted gene 15411 [Source:MGI Symbol%3BAcc:MGI:3705213]	1.05067	0.0473596
Gm12795	predicted gene 12795 [Source:MGI Symbol%3BAcc:MGI:3649205]	1.04895	0.0363149
Skap1	src family associated phosphoprotein 1 [Source:MGI Symbol%3BAcc:MGI:1925723]	1.01764	0.0461925
Traf1	TNF receptor-associated factor 1 [Source:MGI Symbol%3BAcc:MGI:101836]	1.01577	0.0294849
Dnah8	dynein%2C axonemal%2C heavy chain 8 [Source:MGI Symbol%3BAcc:MGI:107714]	1.00257	0.024958
Dgkh	diacylglycerol kinase%2C eta [Source:MGI Symbol%3BAcc:MGI:2444188]	-1.0007	0.0389214
Tmem108	transmembrane protein 108 [Source:MGI Symbol%3BAcc:MGI:1932411]	-1.00071	0.0340476
Tmed5	transmembrane p24 trafficking protein 5 [Source:MGI Symbol%3BAcc:MGI:1921586]	-1.00194	0.0186
Gm22499	predicted gene%2C 22499 [Source:MGI Symbol%3BAcc:MGI:5452276]	-1.02223	0.0432259
Sntg1	syntrophin%2C gamma 1 [Source:MGI Symbol%3BAcc:MGI:1918346]	-1.02546	0.0270744
Gm44005	predicted gene%2C 44005 [Source:MGI Symbol%3BAcc:MGI:5690397]	-1.03035	0.03587
Gm45053	predicted gene 45053 [Source:MGI Symbol%3BAcc:MGI:5753629]	-1.04421	0.00345937
Gm15582	predicted gene 15582 [Source:MGI Symbol%3BAcc:MGI:3783030]	-1.051	0.0307931
Crat	carnitine acetyltransferase [Source:MGI Symbol%3BAcc:MGI:109501]	-1.05262	0.0109792
Fam83c	family with sequence similarity 83%2C member C [Source:MGI Symbol%3BAcc:MGI:1918655]	-1.05341	0.0240801
Ldha-ps2	lactate dehydrogenase A%2C pseudogene 2 [Source:MGI Symbol%3BAcc:MGI:96761]	-1.06247	0.0259182
Cyp4a32	cytochrome P450%2C family 4%2C subfamily a%2C polypeptide 32 [Source:MGI Symbol%3BAcc:MGI:3717148]	-1.07577	0.00306523
Fst	follistatin [Source:MGI Symbol%3BAcc:MGI:95586]	-1.08061	0.0162202
Gm13880	predicted gene 13880 [Source:MGI Symbol%3BAcc:MGI:3649539]	-1.09848	0.00769724
Retsat	retinol saturase (all trans retinol 13%2C14 reductase) [Source:MGI Symbol%3BAcc:MGI:1914692]	-1.11351	0.0043623
G6pc	glucose-6-phosphatase%2C catalytic [Source:MGI Symbol%3BAcc:MGI:95607]	-1.11519	0.0358678
Id1	inhibitor of DNA binding 1 [Source:MGI Symbol%3BAcc:MGI:96396]	-1.11659	0.0253387
Gm20456	predicted gene 20456 [Source:MGI Symbol%3BAcc:MGI:5141921]	-1.12305	0.0135245
Ldha	lactate dehydrogenase A [Source:MGI Symbol%3BAcc:MGI:96759]	-1.12646	0.0171605
Cyp8b1	cytochrome P450%2C family 8%2C subfamily b%2C polypeptide 1 [Source:MGI Symbol%3BAcc:MGI:1338044]	-1.13473	0.03952
Gm6430	predicted gene 6430 [Source:MGI Symbol%3BAcc:MGI:3648857]	-1.13622	0.0309533
Tnfrsf12a	tumor necrosis factor receptor superfamily%2C member 12a [Source:MGI Symbol%3BAcc:MGI:1351484]	-1.14085	0.0425178
Slc25a25	solute carrier family 25 (mitochondrial carrier%2C phosphate carrier)%2C member 25 [Source:MGI Symbol%3BAcc:MGI:1915913]	-1.17189	0.00506037
Gm5096	predicted gene 5096 [Source:MGI Symbol%3BAcc:MGI:3643681]	-1.18519	0.0113449
Gm16323	predicted gene 16323 [Source:MGI Symbol%3BAcc:MGI:3826604]	-1.19498	0.0155669
Ighv1-81	immunoglobulin heavy variable 1-81 [Source:MGI Symbol%3BAcc:MGI:4439635]	-1.2182	0.0124996
Vcan	versican [Source:MGI Symbol%3BAcc:MGI:102889]	-1.23535	0.0391061
Cfap54	cilia and flagella associated protein 54 [Source:MGI Symbol%3BAcc:MGI:1922208]	-1.24812	0.0395415
Npas2	neuronal PAS domain protein 2 [Source:MGI Symbol%3BAcc:MGI:109232]	-1.25413	0.0481611
9530052E02Rik	RIKEN cDNA 9530052E02 gene [Source:MGI Symbol%3BAcc:MGI:3588277]	-1.27435	0.0195337
Gm37928	predicted gene%2C 37928 [Source:MGI Symbol%3BAcc:MGI:5611156]	-1.28569	0.0148487
Fam205a1	family with sequence similarity 205%2C member A1 [Source:MGI Symbol%3BAcc:MGI:3651059]	-1.30172	0.0390108
Acaa1b	acetyl-Coenzyme A acyltransferase 1B [Source:MGI Symbol%3BAcc:MGI:3605455]	-1.30677	0.0477861
Gm44639	predicted gene 44639 [Source:MGI Symbol%3BAcc:MGI:5753215]	-1.32526	0.0122571
Olfr1442	olfactory receptor 1442 [Source:MGI Symbol%3BAcc:MGI:3031276]	-1.4188	0.0494687
Cdkn1a	cyclin-dependent kinase inhibitor 1A (P21) [Source:MGI Symbol%3BAcc:MGI:104556]	-1.43985	0.027048
B130021K23Rik	RIKEN cDNA B130021K23 gene [Source:MGI Symbol%3BAcc:MGI:2442518]	-1.45284	0.00695585
Rps3a2	ribosomal protein S3A2 [Source:MGI Symbol%3BAcc:MGI:3642853]	-1.4658	0.0126442
Slc34a2	solute carrier family 34 (sodium phosphate)%2C member 2 [Source:MGI Symbol%3BAcc:MGI:1342284]	-1.49029	0.00669431
Cyp4a10	cytochrome P450%2C family 4%2C subfamily a%2C polypeptide 10 [Source:MGI Symbol%3BAcc:MGI:88611]	-1.50032	0.0263822
Trcg1	taste receptor cell gene 1 [Source:MGI Symbol%3BAcc:MGI:3576664]	-1.60385	0.0230079
Chrna2	cholinergic receptor%2C nicotinic%2C alpha polypeptide 2 (neuronal) [Source:MGI Symbol%3BAcc:MGI:87886]	-1.64119	0.0245379
Cyp4a31	cytochrome P450%2C family 4%2C subfamily a%2C polypeptide 31 [Source:MGI Symbol%3BAcc:MGI:3028580]	-1.64322	0.0445635
Fam222a	family with sequence similarity 222%2C member A [Source:MGI Symbol%3BAcc:MGI:3605543]	-1.67197	0.00386128
Elovl5	ELOVL family member 5%2C elongation of long chain fatty acids (yeast) [Source:MGI Symbol%3BAcc:MGI:1916051]	-1.73476	0.0294033
Gm38283	predicted gene%2C 38283 [Source:MGI Symbol%3BAcc:MGI:5611511]	-1.80752	0.0103176
Inhbe	inhibin beta-E [Source:MGI Symbol%3BAcc:MGI:109269]	-1.86082	0.0384988
G0s2	G0/G1 switch gene 2 [Source:MGI Symbol%3BAcc:MGI:1316737]	-2.19823	0.0478356
Ehhadh	enoyl-Coenzyme A%2C hydratase/3-hydroxyacyl Coenzyme A dehydrogenase [Source:MGI Symbol%3BAcc:MGI:1277964]	-2.21446	0.0351778
Cgref1	cell growth regulator with EF hand domain 1 [Source:MGI Symbol%3BAcc:MGI:1915817]	-2.40216	0.027814
Fgf21	fibroblast growth factor 21 [Source:MGI Symbol%3BAcc:MGI:1861377]	-4.43452	0.0204078

## Sheet: HFD_PKAi vs HFD_control
Geneid	Description	logFC (HFD_PKAi vs HFD_control)	adj.Pvalue (HFD_PKAi vs HFD_control)
Adra2a	adrenergic receptor%2C alpha 2a [Source:MGI Symbol%3BAcc:MGI:87934]	-5.02172	0.0240172
Saa2	serum amyloid A 2 [Source:MGI Symbol%3BAcc:MGI:98222]	-2.63505	0.0465973
Mmp12	matrix metallopeptidase 12 [Source:MGI Symbol%3BAcc:MGI:97005]	-2.58018	0.0435447
Saa3	serum amyloid A 3 [Source:MGI Symbol%3BAcc:MGI:98223]	-2.39517	0.0141019
Pkp1	plakophilin 1 [Source:MGI Symbol%3BAcc:MGI:1328359]	-2.3738	0.00526801
Tmem171	transmembrane protein 171 [Source:MGI Symbol%3BAcc:MGI:2685751]	-2.25174	0.0372369
Saa1	serum amyloid A 1 [Source:MGI Symbol%3BAcc:MGI:98221]	-2.23975	0.0356252
Fam83a	family with sequence similarity 83%2C member A [Source:MGI Symbol%3BAcc:MGI:2447773]	-2.22207	0.00473782
Serpina7	serine (or cysteine) peptidase inhibitor%2C clade A (alpha-1 antiproteinase%2C antitrypsin)%2C member 7 [Source:MGI Symbol%3BAcc:MGI:3041197]	-2.07207	0.015609
Gm42987	predicted gene 42987 [Source:MGI Symbol%3BAcc:MGI:5663124]	-1.99113	0.0385167
Gdf15	growth differentiation factor 15 [Source:MGI Symbol%3BAcc:MGI:1346047]	-1.94723	0.00583097
Gprc5b	G protein-coupled receptor%2C family C%2C group 5%2C member B [Source:MGI Symbol%3BAcc:MGI:1927596]	-1.9092	0.00323225
Dusp8	dual specificity phosphatase 8 [Source:MGI Symbol%3BAcc:MGI:106626]	-1.87426	0.0281772
Orm2	orosomucoid 2 [Source:MGI Symbol%3BAcc:MGI:97444]	-1.86989	0.0234593
Prune2	prune homolog 2 [Source:MGI Symbol%3BAcc:MGI:1925004]	-1.80525	0.0362938
Pdk4	pyruvate dehydrogenase kinase%2C isoenzyme 4 [Source:MGI Symbol%3BAcc:MGI:1351481]	-1.63949	0.0263068
Tmem255b	transmembrane protein 255B [Source:MGI Symbol%3BAcc:MGI:2685533]	-1.60634	0.0149844
Gm7536	predicted gene 7536 [Source:MGI Symbol%3BAcc:MGI:3645137]	-1.55472	0.010911
Gm43581	predicted gene 43581 [Source:MGI Symbol%3BAcc:MGI:5663718]	-1.49282	0.0197927
Siglech	sialic acid binding Ig-like lectin H [Source:MGI Symbol%3BAcc:MGI:2443256]	-1.41343	0.0475053
Cdkn1a	cyclin-dependent kinase inhibitor 1A (P21) [Source:MGI Symbol%3BAcc:MGI:104556]	-1.38358	0.00512167
Tor3a	torsin family 3%2C member A [Source:MGI Symbol%3BAcc:MGI:1353652]	-1.27711	0.0433269
Isyna1	myo-inositol 1-phosphate synthase A1 [Source:MGI Symbol%3BAcc:MGI:1919030]	-1.24495	0.0486247
Csad	cysteine sulfinic acid decarboxylase [Source:MGI Symbol%3BAcc:MGI:2180098]	-1.24457	0.0073379
Adcy1	adenylate cyclase 1 [Source:MGI Symbol%3BAcc:MGI:99677]	-1.24213	0.0282748
Cish	cytokine inducible SH2-containing protein [Source:MGI Symbol%3BAcc:MGI:103159]	-1.22277	0.00923763
Ccdc120	coiled-coil domain containing 120 [Source:MGI Symbol%3BAcc:MGI:1859619]	-1.20265	0.0478898
Apcs	serum amyloid P-component [Source:MGI Symbol%3BAcc:MGI:98229]	-1.20202	0.049856
Gm26203	predicted gene%2C 26203 [Source:MGI Symbol%3BAcc:MGI:5455980]	-1.19965	0.0461142
Jun	jun proto-oncogene [Source:MGI Symbol%3BAcc:MGI:96646]	-1.1179	0.025528
Adam11	a disintegrin and metallopeptidase domain 11 [Source:MGI Symbol%3BAcc:MGI:1098667]	-1.10796	0.0155056
Plk3	polo-like kinase 3 [Source:MGI Symbol%3BAcc:MGI:109604]	-1.06721	0.00530476
Id3	inhibitor of DNA binding 3 [Source:MGI Symbol%3BAcc:MGI:96398]	-1.01019	0.011826
Synpo	synaptopodin [Source:MGI Symbol%3BAcc:MGI:1099446]	-1.00996	0.0133136
Myadml2os	myeloid-associated differentiation marker-like 2%2C opposite strand [Source:MGI Symbol%3BAcc:MGI:3650756]	1.00614	0.0497605
Gm44851	predicted gene 44851 [Source:MGI Symbol%3BAcc:MGI:5753427]	1.01349	0.0487115
Gm28836	predicted gene 28836 [Source:MGI Symbol%3BAcc:MGI:5579542]	1.06993	0.0226079
Cyp2a5	cytochrome P450%2C family 2%2C subfamily a%2C polypeptide 5 [Source:MGI Symbol%3BAcc:MGI:88597]	1.07784	0.0270727
Lpin1	lipin 1 [Source:MGI Symbol%3BAcc:MGI:1891340]	1.09614	0.0198682
Nr0b2	nuclear receptor subfamily 0%2C group B%2C member 2 [Source:MGI Symbol%3BAcc:MGI:1346344]	1.14306	0.034985
Msh5	mutS homolog 5 [Source:MGI Symbol%3BAcc:MGI:1329021]	1.24627	0.0461116
Gm21887	predicted gene%2C 21887 [Source:MGI Symbol%3BAcc:MGI:5434051]	1.25099	0.0118438
Adam12	a disintegrin and metallopeptidase domain 12 (meltrin alpha) [Source:MGI Symbol%3BAcc:MGI:105378]	1.28852	0.0375214
Ldhb	lactate dehydrogenase B [Source:MGI Symbol%3BAcc:MGI:96763]	1.32972	0.0337918
Dpep1	dipeptidase 1 (renal) [Source:MGI Symbol%3BAcc:MGI:94917]	1.36784	0.0455693
Flrt2	fibronectin leucine rich transmembrane protein 2 [Source:MGI Symbol%3BAcc:MGI:3603594]	1.36955	0.0306214
Gm42531	predicted gene 42531 [Source:MGI Symbol%3BAcc:MGI:5662668]	1.44164	0.0477402
Atp10a	ATPase%2C class V%2C type 10A [Source:MGI Symbol%3BAcc:MGI:1330809]	1.49696	0.0349598
Gm6030	predicted gene 6030 [Source:MGI Symbol%3BAcc:MGI:3645112]	1.56967	0.0173192
Gm26315	predicted gene%2C 26315 [Source:MGI Symbol%3BAcc:MGI:5456092]	1.58229	0.0381053
Rnu3b2	U3B small nuclear RNA 2 [Source:MGI Symbol%3BAcc:MGI:97986]	1.6092	0.0394559
Prc1	protein regulator of cytokinesis 1 [Source:MGI Symbol%3BAcc:MGI:1858961]	1.69748	0.0381735
Pde6c	phosphodiesterase 6C%2C cGMP specific%2C cone%2C alpha prime [Source:MGI Symbol%3BAcc:MGI:105956]	1.76973	0.00827689
Foxm1	forkhead box M1 [Source:MGI Symbol%3BAcc:MGI:1347487]	1.8324	0.0479752
Olig1	oligodendrocyte transcription factor 1 [Source:MGI Symbol%3BAcc:MGI:1355334]	1.8673	0.00596807
Il13ra2	interleukin 13 receptor%2C alpha 2 [Source:MGI Symbol%3BAcc:MGI:1277954]	1.91212	0.0388793
Gm28513	predicted gene 28513 [Source:MGI Symbol%3BAcc:MGI:5579219]	1.92669	0.0446907
Rpl15-ps3	ribosomal protein L15%2C pseudogene 3 [Source:MGI Symbol%3BAcc:MGI:3782952]	2.02168	0.0299225
Rrm2	ribonucleotide reductase M2 [Source:MGI Symbol%3BAcc:MGI:98181]	2.03038	0.0306727
Prom1	prominin 1 [Source:MGI Symbol%3BAcc:MGI:1100886]	2.24179	0.0280575
Ptpn7	protein tyrosine phosphatase%2C non-receptor type 7 [Source:MGI Symbol%3BAcc:MGI:2156893]	2.28387	0.0454533
Igkv5-43	immunoglobulin kappa chain variable 5-43 [Source:MGI Symbol%3BAcc:MGI:4943320]	2.6305	0.0391344
Ighg1	immunoglobulin heavy constant gamma 1 (G1m marker) [Source:MGI Symbol%3BAcc:MGI:96446]	2.88873	0.0441023
Cyp2b10	cytochrome P450%2C family 2%2C subfamily b%2C polypeptide 10 [Source:MGI Symbol%3BAcc:MGI:88598]	7.10647	0.0344562
Cyp1a1	cytochrome P450%2C family 1%2C subfamily a%2C polypeptide 1 [Source:MGI Symbol%3BAcc:MGI:88588]	8.33776	0.0385747
